# Supplementary material
Source: MDPI journal article supplement (https://www.mdpi.com/2673-7272/3/4/44)
Supplement: s1 [file s1]

**Table S1.** Mean scores of all life habits of the LIFE-H according to age and disability groups.

| Domain LIFE-H                             | Cohort<br>(n = 24) | Age              |                   |                |                          | Disability Group                               |                                    |                                |                          |
|-------------------------------------------|--------------------|------------------|-------------------|----------------|--------------------------|------------------------------------------------|------------------------------------|--------------------------------|--------------------------|
|                                           |                    | 18–30<br>(n = 4) | 30–60<br>(n = 16) | >61<br>(n = 4) | ANOVA<br><i>p</i> -Value | Cognitive/<br>Mental<br>Disability<br>(n = 10) | Sensorial<br>Disability<br>(n = 5) | Motor<br>Disability<br>(n = 9) | ANOVA<br><i>p</i> -Value |
| Global score, mean (SD)                   | 7.72 (1.37)        | 8.45 (1.62)      | 7.84 (1.20)       | 6.49 (1.31)    | 0.12                     | 8.11 (1.34)                                    | 7.08 (1.74)                        | 7.65 (1.19)                    | 0.46                     |
| Day-to-day activities, mean (SD)          | 8.23 (1.31)        | 9.00 (0.82)      | 8.18 (1.39)       | 7.65 (1.29)    | 0.29                     | 9.00 (0.85)                                    | 8.02 (1.39)                        | 7.49 (1.34)                    | 0.031                    |
| Communication, mean (SD)                  | 8.79 (1.17)        | 9.72 (0.56)      | 8.69 (1.31)       | 8.29 (0.29)    | 0.06                     | 9.29 (0.92)                                    | 8.20 (0.32)                        | 8.57 (1.53)                    | 0.06                     |
| Transportation, mean (SD)                 | 8.28 (1.47)        | 9.14 (1.02)      | 8.52 (1.35)       | 6.46 (0.87)    | 0.02                     | 9.43 (0.85)                                    | 7.16 (1.77)                        | 7.63 (0.99)                    | 0.006                    |
| Nutrition, mean (SD)                      | 8.72 (2.01)        | 8.33 (3.33)      | 8.71 (1.89)       | 9.13 (1.18)    | 0.91                     | 8.75 (2.22)                                    | 9.30 (1.10)                        | 8.35 (2.24)                    | 0.71                     |
| Conditions, mean (SD)                     | 8.56 (1.53)        | 9.69 (0.63)      | 8.71 (1.29)       | 6.79 (1.82)    | 0.04                     | 9.18 (1.52)                                    | 7.27 (1.90)                        | 8.57 (0.92)                    | 0.03                     |
| Personal care, mean (SD)                  | 8.83 (1.51)        | 9.42 (1.17)      | 8.58 (1.69)       | 9.21 (0.88)    | 0.51                     | 9.88 (0.27)                                    | 9.37 (0.84)                        | 7.35 (1.44)                    | <0.001                   |
| Residence, mean (SD)                      | 6.19 (3.51)        | 7.71 (2.01)      | 5.85 (3.64)       | 6.04 (4.49)    | 0.74                     | 7.46 (3.15)                                    | 6.83 (4.27)                        | 4.43 (3.05)                    | 0.08                     |
| Social roles, mean (SD)                   | 7.21 (1.82)        | 7.90 (2.60)      | 7.51 (1.46)       | 5.32 (1.46)    | 0.07                     | 7.21 (1.94)                                    | 6.13 (2.21)                        | 7.81 (1.31)                    | 0.32                     |
| Responsibilities, mean (SD)               | 9.15 (1.34)        | 9.23 (0.57)      | 9.34 (0.99)       | 8.31 (2.72)    | 0.57                     | 9.08 (0.84)                                    | 8.65 (2.47)                        | 9.50 (1.01)                    | 0.24                     |
| Interpersonal relationships, mean (SD)    | 9.55 (0.64)        | 9.38 (0.63)      | 9.55 (0.70)       | 9.69 (0.63)    | 0.49                     | 9.22 (0.73)                                    | 9.50 (0.69)                        | 9.93 (0.17)                    | 0.06                     |
| Associative and spiritual life, mean (SD) | 6.88 (4.20)        | 7.50 (5.00)      | 7.53 (3.90)       | 3.63 (4.19)    | 0.09                     | 6.55 (4.59)                                    | 4.70 (4.35)                        | 8.44 (3.43)                    | 0.06                     |
| Education, mean (SD)                      | 3.86 (4.43)        | 6.63 (4.53)      | 3.75 (4.55)       | 1.50 (3.00)    | 0.27                     | 2.90 (4.68)                                    | 3.00 (4.24)                        | 5.40 (4.31)                    | 0.48                     |
| Work, mean (SD)                           | 6.36 (3.90)        | 7.88 (2.53)      | 7.01 (3.52)       | 2.25 (4.50)    | 0.11                     | 7.52 (4.11)                                    | 3.73 (5.12)                        | 6.53 (2.38)                    | 0.15                     |
| Leisure, mean (SD)                        | 7.15 (2.79)        | 6.79 (4.72)      | 7.38 (2.48)       | 6.56 (2.53)    | 0.69                     | 7.21 (3.95)                                    | 7.21 (2.63)                        | 7.04 (1.28)                    | 0.37                     |

**Table S2.** Percentages of social participation satisfaction.

| <b>LIFE-H Domains</b>             | <b>Satisfied</b> | <b>Non Satisfied</b> | <b>Not Applicable</b> |
|-----------------------------------|------------------|----------------------|-----------------------|
| Global score, %                   | 80.00            | 20.00                | -                     |
| Daily activities, %               | 80.00            | 20.00                | -                     |
| Communication, %                  | 80.00            | 20.00                | -                     |
| Transportation, %                 | 79.00            | 21.00                | -                     |
| Nutrition, %                      | 85.00            | 15.00                | -                     |
| Fitness, %                        | 82.00            | 18.00                | -                     |
| Personal care, %                  | 84.00            | 16.00                | -                     |
| Housing, %                        | 70.00            | 30.00                | -                     |
| Social role, %                    | 81.00            | 19.00                | -                     |
| Responsibilities, %               | 90.00            | 10.00                | -                     |
| Social relationships, %           | 85.00            | 15.00                | -                     |
| Associative and spiritual life, % | 66.00            | 8.00                 | 26.00                 |
| Education, %                      | 30.00            | 22.00                | 48.00                 |
| Work, %                           | 64.00            | 18.00                | 18.00                 |
| Leisure, %                        | 74.00            | 26.00                | -                     |

**Table S3.** Mean scores of environmental factors according to age and disability groups.

| Environmental<br>Factor MQE                     | Cohort<br>(n = 21) | Age              |                   |                | ANOVA<br><i>p</i> -Value | Disability Group                               |                                    |                                |                          |
|-------------------------------------------------|--------------------|------------------|-------------------|----------------|--------------------------|------------------------------------------------|------------------------------------|--------------------------------|--------------------------|
|                                                 |                    | 18–30<br>(n = 4) | 30–60<br>(n = 16) | >61<br>(n = 4) |                          | Cognitive/<br>Mental<br>Disability<br>(n = 10) | Sensorial<br>Disability<br>(n = 5) | Motor<br>Disability<br>(n = 9) | ANOVA<br><i>p</i> -Value |
| Support from those around you, mean (SD)        | 2.76 (0.54)        | 3.00 (0)         | 2.79 (0.43)       | 2.50 (1.00)    | 0.64                     | 2.88 (0.35)                                    | 2.60 (0.89)                        | 2.75 (0.46)                    | 0.81                     |
| Attitudes of those around you, mean (SD)        | 2.30 (1.13)        | 3.00 (0)         | 2.15 (1.14)       | 2.25 (1.50)    | 0.28                     | 2.57 (0.54)                                    | 2.40 (1.34)                        | 2.00 (1.41)                    | 0.63                     |
| Current availability of work, mean (SD)         | −1.06 (1.89)       | 1.00 (1.73)      | −1.38 (1.66)      | −3.00 (0)      | 0.09                     | −0.25 (2.12)                                   | −1.00 (2.83)                       | −2.00 (1.00)                   | 0.31                     |
| Characteristics of work environment, mean (SD)  | 0.06 (2.26)        | 1.00 (1.73)      | 0.08 (1.31)       | −3.00 (0)      | 0.29                     | 1.50 (1.60)                                    | −1.00 (2.83)                       | −1.50 (1.87)                   | 0.035                    |
| Personal income, mean (SD)                      | 1.43 (1.72)        | 3.00 (0)         | 0.86 (1.70)       | 2.25 (1.50)    | 0.018                    | 1.38 (2.07)                                    | 1.80 (1.64)                        | 1.25 (1.58)                    | 0.70                     |
| Insurance and financial compensation, mean (SD) | 0.11 (2.08)        | 0 (0)            | −0.15 (2.08)      | 1.00 (2.71)    | 0.56                     | −0.57 (1.81)                                   | 0.80 (2.39)                        | 0.28 (2.21)                    | 0.41                     |
| Stores and services, mean (SD)                  | −0.15 (2.32)       | 3.00 (0)         | −0.29 (2.02)      | −2.67 (0.58)   | 0.008                    | 1.50 (2.14)                                    | −2.25 (0.98)                       | −0.75 (1.91)                   | 0.014                    |
| Home care services, mean (SD)                   | 1.25 (2.40)        | 3.00 (0)         | 1.71 (1.98)       | −2.75 (0.58)   | 0.015                    | 2.00 (1.93)                                    | −2.75 (0.50)                       | 2.50 (0.54)                    | 0.006                    |
| Educational services, mean (SD)                 | 2.30 (1.25)        | 3.00 (0)         | 2.00 (1.41)       | /              | 0.21                     | 3.00 (0)                                       | 0 (/)                              | 1.67 (1.53)                    | 0.043                    |
| Personal vehicle, mean (SD)                     | 1.78 (1.73)        | 0.67 (1.15)      | 2.08 (1.80)       | 1.50 (2.12)    | 0.21                     | 1.57 (1.51)                                    | 0.68 (2.08)                        | 2.38 (1.77)                    | 0.22                     |

|                                                       |              |              |              |              |       |              |              |              |       |
|-------------------------------------------------------|--------------|--------------|--------------|--------------|-------|--------------|--------------|--------------|-------|
| Public transportation, mean (SD)                      | 1.00 (1.86)  | 1.00 (1.73)  | 1.22 (1.72)  | 0.50 (2.65)  | 0.93  | 1.38 (1.51)  | 0.20 (2.39)  | 1.33 (2.08)  | 0.56  |
| Radio and television, mean (SD)                       | 1.37 (2.14)  | 3.00 (0)     | 1.83 (1.70)  | -1.25 (2.06) | 0.017 | 3.00 (0)     | -1.40 (1.82) | 1.71 (1.38)  | 0.002 |
| Electronic communication, mean (SD)                   | 1.85 (1.63)  | 2.67 (0.58)  | 2.00 (1.47)  | 0.33 (2.52)  | 0.33  | 2.00 (1.60)  | 0.50 (2.08)  | 2.38 (1.19)  | 0.202 |
| Community and cultural services, mean (SD)            | 1.67 (1.65)  | 2.00 (1.73)  | 1.93 (1.27)  | 0.50 (2.65)  | 0.50  | 2.00 (1.41)  | 0.20 (2.39)  | 2.25 (0.71)  | 0.199 |
| Physical accessibility of your residence, mean (SD)   | 1.75 (1.71)  | 2.00 (1.73)  | 1.77 (1.83)  | 1.50 (1.73)  | 0.92  | 2.14 (1.46)  | 1.20 (1.64)  | 1.75 (2.05)  | 0.62  |
| Physical accessibility of buildings                   | 1.15 (1.73)  | 2.00 (1.73)  | 1.00 (1.91)  | 1.00 (1.15)  | 0.53  | 2.14 (1.46)  | 0.80 (1.10)  | 0.50 (2.00)  | 0.08  |
| Road accessibility in your community, mean (SD)       | -0.25 (2.40) | 2.00 (1.73)  | -0.31 (1.73) | -1.75 (1.89) | 0.11  | 2.29 (1.25)  | -1.40 (1.82) | -1.75 (1.58) | 0.003 |
| Climatic conditions, mean (SD)                        | 0.05 (2.14)  | 2.00 (1.73)  | -0.31 (2.36) | -0.25 (0.50) | 0.21  | 1.71 (2.36)  | -0.20 (0.45) | -1.25 (1.67) | 0.025 |
| Light intensity, mean (SD)                            | 0.43 (1.75)  | 2.00 (1.73)  | 0.43 (1.16)  | -0.75 (2.87) | 0.17  | 1.50 (1.69)  | -0.60 (2.51) | 0 (0)        | 0.10  |
| Noise and sound intensity, mean (SD)                  | -0.09 (1.87) | 2.00 (1.73)  | -0.14 (1.61) | -1.50 (1.73) | 0.08  | 1.00 (2.20)  | -1.80 (1.64) | -0.13 (0.35) | 0.09  |
| Time allowed to carry out tasks, mean (SD)            | -0.35 (2.48) | 3.00 (0)     | -0.64 (2.31) | -2.33 (0.58) | 0.044 | 2.25 (1.39)  | -1.75 (1.26) | -2.25 (1.04) | 0.001 |
| Objects that you use, mean (SD)                       | 1.05 (1.88)  | 3.00 (0)     | 0.86 (1.83)  | 0.25 (2.06)  | 0.08  | 2.13 (1.36)  | 0 (1.87)     | 0.63 (2.00)  | 0.08  |
| Assistive devices, mean (SD)                          | 1.15 (2.32)  | 2.00 (1.73)  | 0.85 (2.34)  | 1.50 (3.00)  | 0.57  | 1.29 (1.60)  | 0.60 (3.29)  | 1.38 (2.45)  | 0.97  |
| Means of participating in decision-making, mean (SD)  | 0.81 (2.23)  | 2.67 (0.58)  | 0.67 (2.29)  | -0.25 (2.36) | 0.26  | 1.67 (1.97)  | -0.40 (2.07) | 1.00 (2.55)  | 0.36  |
| Governmental and administrative procedures, mean (SD) | -0.10 (2.07) | 0 (0)        | -0.31 (2.10) | 0.50 (3.00)  | 0.79  | 0.38 (1.92)  | 0.40 (2.61)  | -1.00 (1.83) | 0.37  |
| Rules and administrative procedures, mean (SD)        | -0.90 (1.60) | -1.00 (1.73) | -0.50 (1.62) | -2.33 (0.58) | 0.18  | -0.18 (1.94) | -1.75 (1.26) | -1.00 (1.41) | 0.38  |
